# Supplementary material
Source: Elsevier journal article supplement (https://comptes-rendus.academie-sciences.fr/biologies/article/10.1016/j.crvi.2014.12.003/file/attach/mmc8.pdf)

Appendix H. Species tree reconstructed under \*BEAST using 12 independent markers

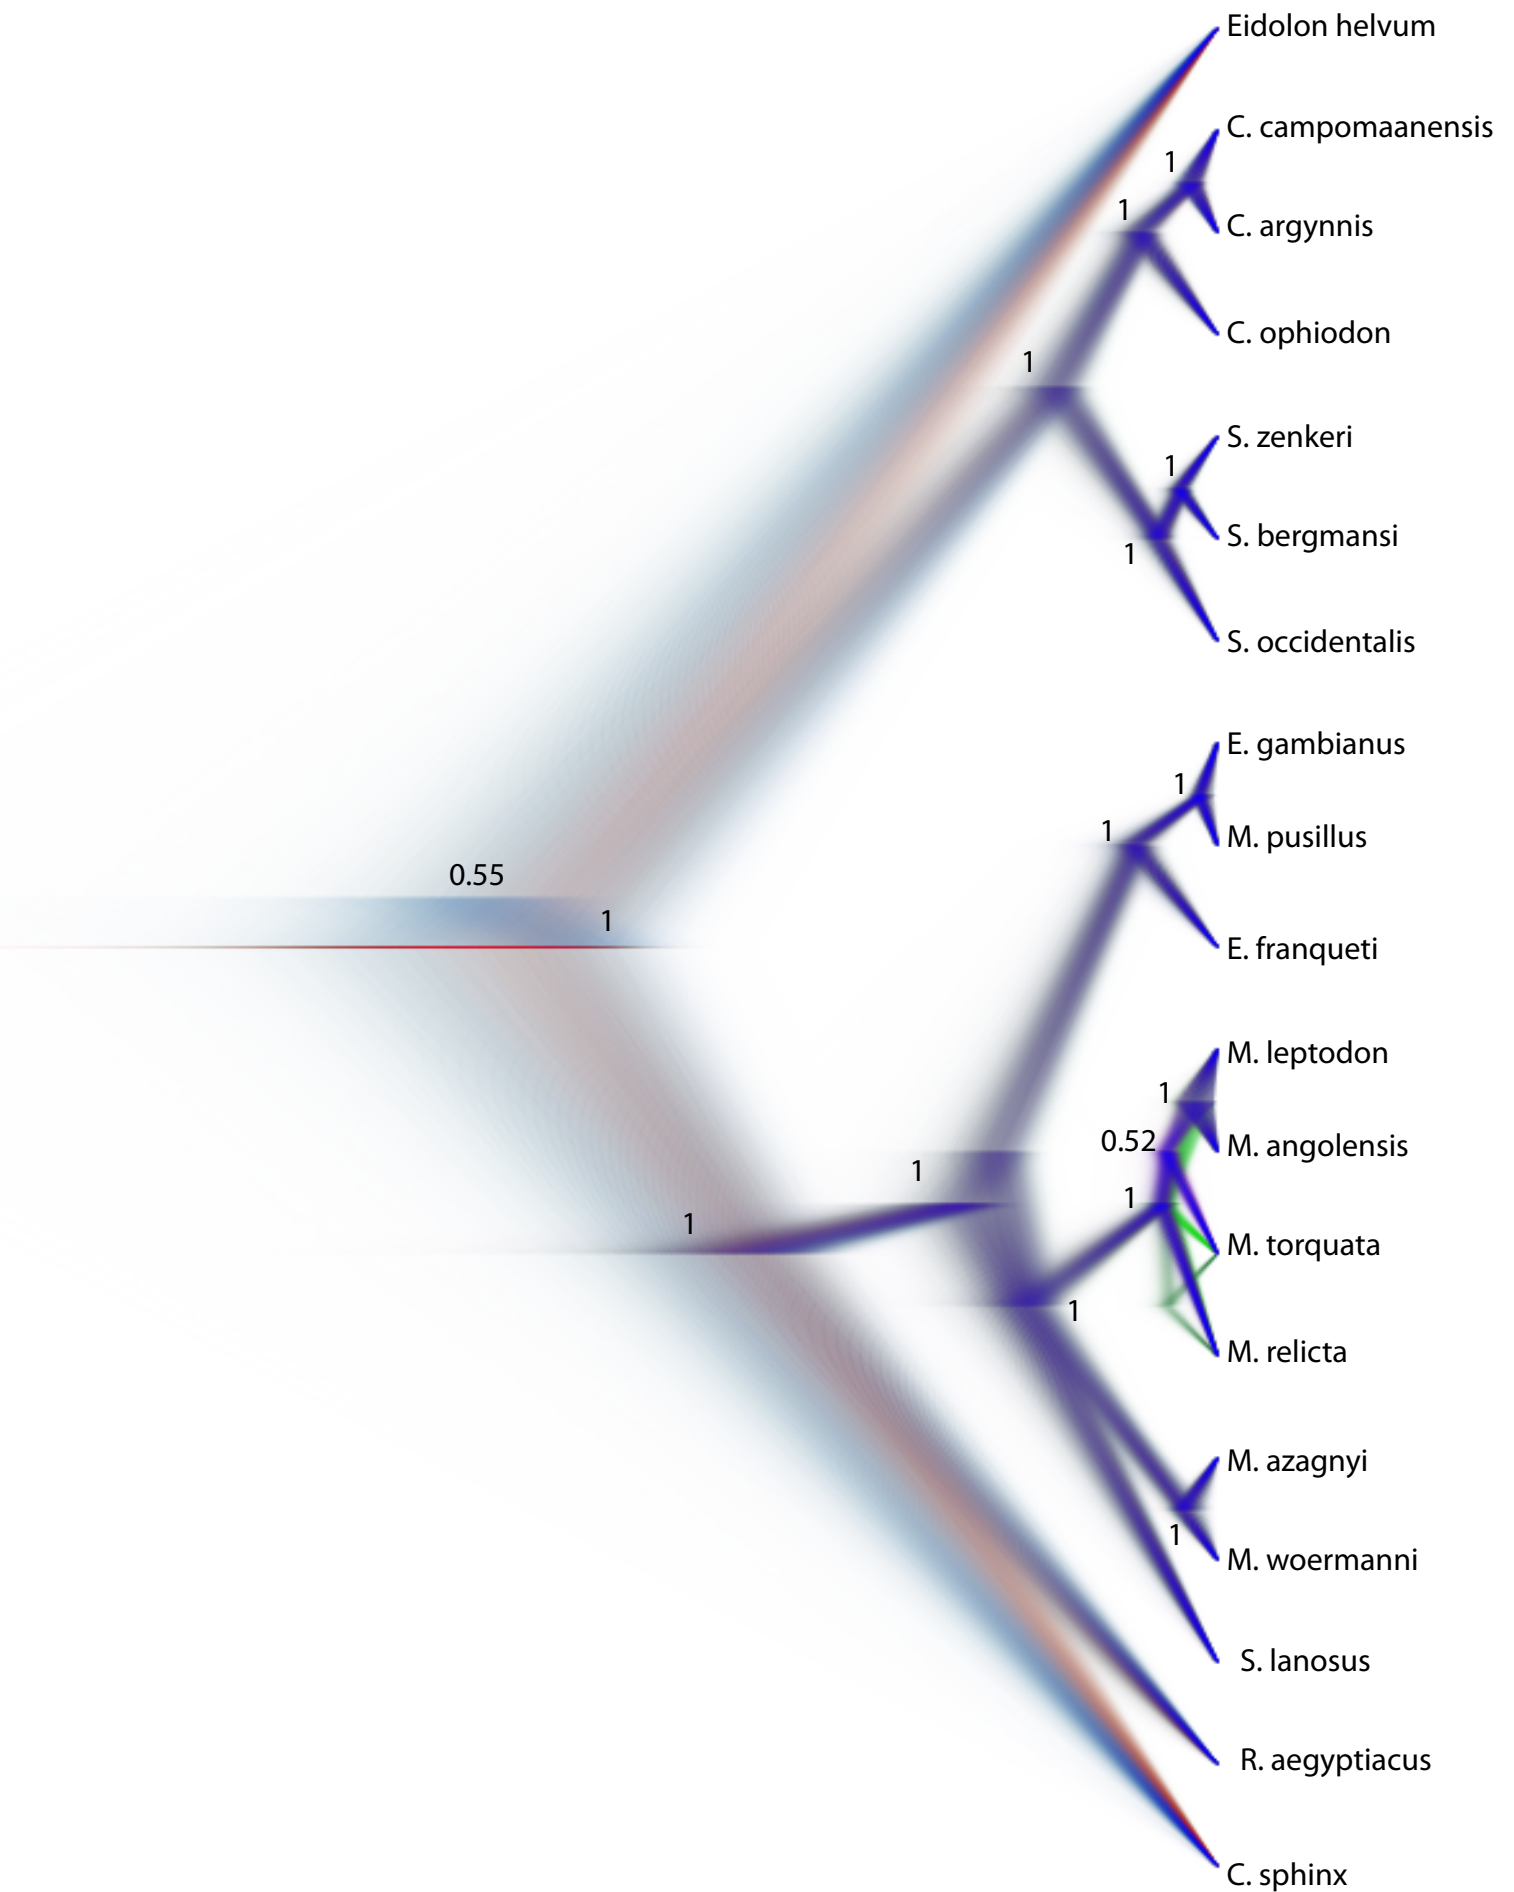

Supplement: mmc8 [file mmc8.pdf]
